# Supplementary material for: Hidden complexities in the reaction of H2O2 and HNO revealed by ab initio quantum chemical investigations
Source: Royal Society of Chemistry journal article supplement (doi:10.1039/c7cp05883g), 2017-01-01
Supplement: c7cp05883g1.pdf [file c7cp05883g1.pdf]

# Hidden Complexities in the Reaction of $\text{H}_2\text{O}_2$ and $\text{HNO}$ Revealed by Ab Initio Quantum Chemical Investigations

Daniel Beckett, Marc Edelmann, Jonathan D. Raff, and Krishnan Raghavachari  
*Department of Chemistry, Indiana University, Bloomington, IN 47405, USA*

## Supporting Information

Table S1: Post-Hartree-Fock activation energies at the aug-cc-pVDZ basis used in the NEVPT2 extrapolation described in the Methods section of the main text, CCSD(T) and BD(T) calculations performed with an RHF reference wavefunction. Results at the aug-cc-pVTZ basis for CCSD(T) and BD(T) and the extrapolated aug-cc-pVTZ basis for NEVPT2 and CASSCF can be seen in the main text in Table 7. Columns 3 and 5 report the difference between the aug-cc-pVTZ and aug-cc-pVDZ energies, as described in Equation 1, for CCSD(T) and BD(T). The deltas obtained for CCSD(T) and BD(T) are nearly identical. Energies in kcal/mol relative to associated complexes as illustrated in Figure 1 of the main text. Geometries optimized at the UB3LYP/aug-cc-pVTZ level of theory.

|           | CCSD(T)/augdz | $\Delta$ CCSD(T) | BD(T)/augdz | $\Delta$ BD(T) | NEVPT2/augdz |
|-----------|---------------|------------------|-------------|----------------|--------------|
| TS1       | 28.9          | 2.3              | 28.8        | 2.4            | 27.0         |
| TS2-grott | 24.5          | -0.7             | 24.4        | -0.7           | 24.0         |
| TS2-inter | 40.6          | -0.7             | 40.6        | -0.7           | 40.4         |
| TS2-intra | 55.8          | -0.2             | 55.8        | -0.2           | 54.8         |
| TS3       | 11.9          | -0.0             | 11.9        | -0.0           | 10.7         |

Table S2: Post-Hartree-Fock activation energies at the cc-pVDZ basis used in the CASSCF extrapolation described in the Methods section of the main text, CCSD(T) and BD(T) calculations performed with an RHF reference wavefunction. Results at the aug-cc-pVTZ basis for CCSD(T) and BD(T) and the extrapolated aug-cc-pVTZ basis for CASSCF and NEVPT2 can be seen in the main text in Table 7. Columns 3 and 5 report the difference between the aug-cc-pVTZ and cc-pVDZ energies, as described in Equation 1, for CCSD(T) and BD(T). The deltas obtained for CCSD(T) and BD(T) are nearly identical. Energies in kcal/mol relative to associated complexes as illustrated in Figure 1 of the main text. Geometries optimized at the B3LYP/aug-cc-pVTZ level of theory. NEVPT2/cc-pVDZ barriers included as comparison.

|           | CCSD(T)/dz | $\Delta$ CCSD(T) | BD(T)/dz | $\Delta$ BD(T) | CASSCF/dz | NEVPT2/dz |
|-----------|------------|------------------|----------|----------------|-----------|-----------|
| TS1       | 33.6       | -2.4             | 33.6     | -2.5           | 36.6      | 33.1      |
| TS2-grott | 21.7       | 2.1              | 21.6     | 2.1            | 24.9      | 22.7      |
| TS2-inter | 43.3       | -3.4             | 43.3     | -3.4           | 42.5      | 42.2      |
| TS2-intra | 57.4       | -1.7             | 57.4     | -1.7           | 60.8      | 55.7      |
| TS3       | 12.4       | -0.6             | 12.5     | -0.6           | 13.0      | 11.6      |

Table S3: UB3LYP/aug-cc-pVTZ optimized structures and zero-point corrected energy, in Hartree, of each transition state and intermediate as shown in Figures 1, 3, and 5 of the main text.

| Reactant Complex    | E= -282.130540 |           |           |
|---------------------|----------------|-----------|-----------|
| N                   | -1.101187      | -0.377701 | 1.596220  |
| H                   | -0.741944      | -1.009137 | 0.835503  |
| O                   | -1.791462      | 0.473294  | 1.095767  |
| O                   | -1.613456      | 0.048846  | -1.785738 |
| O                   | -1.144750      | -1.258108 | -1.367333 |
| H                   | -1.797486      | -1.832460 | -1.786502 |
| H                   | -1.870708      | 0.420159  | -0.924967 |
| Reactant to Int1 TS | E= -282.127181 |           |           |
| N                   | -0.978180      | 0.513310  | 0.733004  |
| H                   | -1.406552      | -0.199716 | 1.381890  |
| O                   | 0.199219       | 0.303269  | 0.628607  |
| O                   | -2.300001      | -1.324177 | -1.007621 |
| O                   | -1.433136      | -1.058758 | -2.133182 |
| H                   | -0.911579      | -0.314863 | -1.801049 |
| H                   | -3.142528      | -0.987272 | -1.338271 |
| Int1                | E= -282.130304 |           |           |
| N                   | -0.797887      | 0.056252  | 0.861600  |
| H                   | -0.393113      | -0.904302 | 1.020778  |
| O                   | -1.937511      | 0.092537  | 1.221896  |
| O                   | 1.485964       | 1.157508  | -0.583893 |
| O                   | 1.501689       | -0.218890 | -1.038290 |
| H                   | 1.399102       | -0.099032 | -1.990226 |
| H                   | 0.647392       | 1.158931  | -0.088974 |
| TS1                 | E= -282.094397 |           |           |
| N                   | -0.416688      | 1.811231  | 0.373860  |
| H                   | 0.289802       | 1.784190  | 1.139107  |
| O                   | -1.199153      | 0.902817  | 0.374830  |
| O                   | 0.717922       | 2.036769  | -0.986609 |
| O                   | 2.035557       | 1.519156  | -2.071022 |
| H                   | 2.667330       | 2.155058  | -1.709937 |
| H                   | 0.085207       | 1.985614  | -1.715245 |
| Int2                | E= -282.228122 |           |           |
| N                   | -0.306951      | -0.458446 | 0.006176  |
| H                   | -0.075892      | -0.806839 | -0.946180 |
| O                   | 0.292415       | -0.969808 | 0.924897  |
| O                   | -1.150150      | 0.416334  | 0.055864  |
| O                   | -2.002752      | 1.613551  | 2.799557  |
| H                   | -1.488657      | 1.160810  | 3.472160  |
| H                   | -1.718225      | 1.223388  | 1.965408  |
| Int2 to Int3 TS     | E= -282.227909 |           |           |
| N                   | -0.108837      | -0.575257 | -0.328587 |
| H                   | -0.542264      | -0.237920 | -1.211703 |
| O                   | -0.368568      | -1.711485 | -0.005040 |
| O                   | 0.596455       | 0.226757  | 0.253284  |
| O                   | -1.346089      | 0.906121  | 2.475862  |
| H                   | -1.438048      | 0.312554  | 3.225110  |
| H                   | -0.453155      | 0.760018  | 2.146815  |

| Int3 | E= -282.235447 |           |           |
|------|----------------|-----------|-----------|
| N    | -0.622402      | -0.189438 | 0.493184  |
| H    | 0.224531       | 0.031717  | -0.080133 |
| O    | -0.442649      | -0.867611 | 1.488175  |
| O    | -1.681749      | 0.255889  | 0.091051  |
| O    | 1.721469       | 0.420752  | -1.095680 |
| H    | 2.550038       | -0.059829 | -1.017082 |
| H    | 1.674611       | 0.732894  | -2.003445 |

  

| TS2-grott | E= -282.202061 |           |           |
|-----------|----------------|-----------|-----------|
| N         | -0.579491      | 0.058739  | 0.320863  |
| H         | 0.777168       | 0.247420  | -0.032770 |
| O         | -1.285975      | -0.387969 | 1.177547  |
| O         | -1.073415      | 0.607382  | -0.731514 |
| O         | 1.284454       | 0.782813  | -0.929470 |
| H         | 1.742998       | 0.157871  | -1.502043 |
| H         | 0.233406       | 0.884708  | -1.231384 |

  

| TS2-inter | E= -282.174427 |           |           |
|-----------|----------------|-----------|-----------|
| N         | -0.971375      | 0.255613  | 0.266265  |
| H         | 0.531063       | 0.303873  | 0.039013  |
| O         | -0.393958      | -0.811745 | 0.698627  |
| O         | -2.162868      | 0.388303  | 0.406627  |
| O         | 1.562606       | 0.506801  | -0.322546 |
| H         | 1.990833       | -0.363320 | -0.351099 |
| H         | 1.519959       | 0.876794  | -1.216552 |

  

| TS2-intra | E= -282.152018 |           |           |
|-----------|----------------|-----------|-----------|
| N         | -0.705670      | -0.115780 | 0.637042  |
| H         | -0.480127      | -0.510882 | 1.737187  |
| O         | -1.725669      | -0.418414 | 1.396792  |
| O         | -0.822805      | 0.286517  | -0.475303 |
| O         | 2.171346       | 0.537653  | -0.955735 |
| H         | 2.591140       | 0.842243  | -1.763502 |
| H         | 1.224031       | 0.575832  | -1.126801 |

  

| Int4 | E= -282.245762 |           |           |
|------|----------------|-----------|-----------|
| N    | -0.987070      | -0.075843 | -0.020953 |
| H    | 0.874714       | 0.143608  | 0.112274  |
| O    | -1.936268      | -0.377041 | 0.598799  |
| O    | 0.175226       | -0.129123 | 0.745261  |
| O    | 2.085449       | 0.661882  | -1.136715 |
| H    | 1.708014       | 0.738388  | -2.017957 |
| H    | 2.592993       | 1.465938  | -0.995431 |

  

| TS3 | E= -282.227641 |           |           |
|-----|----------------|-----------|-----------|
| N   | -1.391236      | -0.320468 | 0.290114  |
| H   | 0.305835       | 0.624492  | -0.043869 |
| O   | -1.155635      | -1.298985 | 0.869882  |
| O   | -0.435414      | 0.741138  | 0.591944  |
| O   | 1.714819       | 0.463196  | -1.174654 |
| H   | 1.880032       | 1.217769  | -1.747034 |
| H   | 2.555280       | 0.259856  | -0.754376 |

| Product Complex | E= -282.244238 |           |           |
|-----------------|----------------|-----------|-----------|
| N               | -0.840434      | -0.350440 | 0.747287  |
| H               | 0.152308       | 0.835004  | -0.394769 |
| O               | 0.065991       | -1.101133 | 0.588003  |
| O               | -0.712054      | 0.840047  | 0.095832  |
| O               | 1.728712       | 0.643280  | -1.237804 |
| H               | 2.489513       | 1.226513  | -1.167438 |
| H               | 1.996389       | -0.202511 | -0.862061 |

| TS2-grott2x | E= -358.679594 |           |           |
|-------------|----------------|-----------|-----------|
| N           | -0.495867      | 0.027860  | 0.335072  |
| H           | 0.946205       | -0.057800 | 0.039514  |
| O           | -1.049404      | -0.039810 | 1.403862  |
| O           | -1.199185      | 0.180574  | -0.723071 |
| O           | 1.885881       | -0.053791 | -0.531011 |
| H           | 2.390513       | -0.855800 | -0.363912 |
| H           | 1.402392       | 0.000525  | -1.600849 |
| O           | 0.546072       | 0.214355  | -2.491443 |
| H           | 0.447821       | -0.476997 | -3.151805 |
| H           | -0.305064      | 0.211249  | -1.839430 |
